# Supplementary material for: Inducible miR-150 Inhibits Porcine Reproductive and Respiratory Syndrome Virus Replication by Targeting Viral Genome and Suppressor of Cytokine Signaling 1
Source: MDPI journal article supplement (doi:10.3390/v14071485), 2022-07-07
Supplement: s1 [file s1]

**Table S2** Primers used in qRT-PCR analysis

| Primers   | Sequences (5'→3')        |
|-----------|--------------------------|
| ORF7-F    | AATAACAACGGCAAGCAGCA     |
| ORF7-R    | GCACAGTATGATGCGTCGGC     |
| MX1-F     | CACAGAACTGCCAAGTCCAA     |
| MX1-R     | GCAGTACACGATCTGCTCCA     |
| ISG56-F   | TCAGAGGTGAGA AGGCTGGT    |
| ISG56-R   | GCTTCCTGCAAGTGTCCTTC     |
| SOCS1-F   | CGCCCTCAGTGTGAAGATGG     |
| SOCS1-R   | GCTCGAAGAGGCAGTCGAAG     |
| GAPDH-F   | CCTTCCGTGTCCCTACTGCCAAC  |
| GAPDH-R   | GACGCCTGCTTCACCACCTTCT   |
| PEDV-N-F  | AACAGCTTCCCAGCGTAGTTGA   |
| PEDV-N-R  | GAAGTGGCTCTGGATTTGTTCTTC |
| miR-150-F | AGTGCTGTCTCCCAACCCTT     |
| miR-150-R | TATGGTTGTTACGACTCCTTCAC  |
| U6-F      | CGCTTCGGCAGCACATATAC     |
| U6-R      | TTCACGAATTTGCGTGTTCATC   |
| HV UTR-F  | TGGCATTCTTTGGCACCTCA     |
| HV UTR-R  | ATTACGGCCGCATGGTTCTC     |
