# Supplementary material for: Inducible miR-150 Inhibits Porcine Reproductive and Respiratory Syndrome Virus Replication by Targeting Viral Genome and Suppressor of Cytokine Signaling 1
Source: MDPI journal article supplement (doi:10.3390/v14071485), 2022-07-07
Supplement: s1 [file s1]

**Table S3** Primers used in PCR and plasmid construction

| Primers           | Sequences (5'→3')              |
|-------------------|--------------------------------|
| -2029/+25 F       | GGCTAGCCATCACACCCAAGGTCACCCA   |
| -1524/+25 F       | GGCTAGCCTGCCCAAGTCCCTTCATAAACA |
| -1014/+25 F       | GGCTAGCCTGGGAGAATGTGGGGATTGA   |
| -500/+25 F        | GGCTAGCCACCGGGGCTATCAGGTGT     |
| -43/+25 F         | GGCTAGCCCGGGCCGGTCCAGAGGCA     |
| R                 | CCTCGAGGACAAGGGTTGGGAGATAGG    |
| PRRSV 3'UTR-F     | GCTCTAGATGGGCTGGCATTCTTTGG     |
| PRRSV 3'UTR-R     | GCTCTAGAAATTACGGCCGCATGGTTCT   |
| PRRSV 3'UTR-mut R | CTCTATGTGTGGTGAATGGCAC         |
| PRRSV 3'UTR-mut R | GGTTTTCTAACACTGAGGTGCC         |
| SOCS1 3'UTR F     | CTCTAGAGCTGCACGGAGCATTA ACT    |
| SOCS1 3'UTR R     | CTCTAGAGTTATTACCTAAACTGGTGGT   |
| SOCS1 3'UTR-mut F | TGTAGGGTCTCTGGCTTTATTTTTC      |
| SOCS1 3'UTR-mut R | AACCCCCCTGGTTTGTGCAAAG         |
| ChIP c-Jun1-F     | ACCTGAGACTAGGGAGCCTGA          |
| ChIP c-Jun1-R     | GTGGGGCTGCCGTGTTTAC            |
| ChIP c-Jun2-F     | GGTCTCTGTCCCTCTCGGA            |
| ChIP c-Jun2-F     | CAAAGAGGGCAGGAAGGGG            |
