# Supplementary material for: Inducible miR-150 Inhibits Porcine Reproductive and Respiratory Syndrome Virus Replication by Targeting Viral Genome and Suppressor of Cytokine Signaling 1
Source: MDPI journal article supplement (doi:10.3390/v14071485), 2022-07-07
Supplement: s1 [file s1]

**Table S1** Sequences of miRNA and siRNA

| name                  | sequence               |
|-----------------------|------------------------|
| siSOCS1-1             | CCUGCACGGAGCAUUAACUTT  |
| siSOCS1-2             | GCCGACAAUGCAAUCUCCATT  |
| si-c-Jun              | GCAAAGAUGGAAACGACCUTT  |
| ssc-miR-150           | UCUCCCAACCCUUGUACCAGUG |
| ssc-miR-150 inhibitor | CACUGGUACAAGGGUUGGGAGA |
